# Supplementary material
Source: PubMed Central journal article supplement (PMC4677540)
Supplement: Supp_Table1.pdf [file Supp_Table1.pdf]

**Supplementary Table S1.** *Improvement of merged paired-end reads in alignment and RIS identification*

| Merged Paired Sequences     |  | #           |
|-----------------------------|--|-------------|
| Total reads                 |  | 2489444     |
| Alignment filters           |  | #           |
| Repeats                     |  | 74816 3.005 |
| Unique RISs                 |  | 1643 1.724  |
| Mean bit score              |  | 255.532     |
| Non-Merged Paired Sequences |  | #           |
| Total reads                 |  | 2489444     |
| Alignment filters           |  | #           |
| Repeats                     |  | 85145 3.42  |
| Unique RISs                 |  | 1585 1.446  |
| Mean bit score              |  | 225.131     |
| Unique RIS Z Score Ratio    |  | 5.049       |
| Unique RIS P Value          |  | 0.00001     |
| Repeat Z Score Ratio        |  | -26.25      |
| Repeat P Value              |  | 0.00001     |

The table reports the total number of sequence reads, number of unique retroviral integration site (RISs) identified, mean alignment of blastbit score, and the number of reads excluded because of unreliable mapping in a repetitive region of the genome. The number of sequences filtered out because of unreliable mapping in repeat regions was significantly reduced, and the alignment of blastbit score was improved. Finally, the number of unique integrations identified using merged paired-end reads was significantly higher than unmerged reads. Statistics were calculated using the z-ratio for the significance of the difference between two independent proportions on a two-tailed probability with a significance of 0.01.
